# Supplementary material for: Double NF1 Inactivation Affects Adrenocortical Function in NF1Prx1 Mice and a Human Patient
Source: PubMed Central journal article supplement (PMC4361563; doi:10.1371/journal.pone.0119030), 2015-03-16
Supplement: pone.0119030.s002.pdf [file pone.0119030.s002.pdf]

| Spot ID | p-value | expression ratio (Mut/Ctrl) | MOWSE score | Number of identified peptides | Sequence coverage (%) | Gene name |
|---------|---------|-----------------------------|-------------|-------------------------------|-----------------------|-----------|
| BID770  | 0,02    | 0,64                        | 188         | 3                             | 8                     | Acads     |
| BID763  | 0,01    | 1,68                        | 54          | 1                             | 2                     | Acat2     |
| BID1747 | 0,04    | 1,60                        | 66          | 1                             | 8                     | Acot13    |
| SID1527 | 0,04    | 1,59                        | 149         | 3                             | 10                    | Actb      |
| SID1541 | 0,04    | 2,25                        | 149         | 3                             | 10                    | Actb      |
| BID614  | 0,01    | 0,83                        | 246         | 5                             | 14                    | Ahcy      |
| BID617  | 0,04    | 0,68                        | 246         | 5                             | 14                    | Ahcy      |
| SID848  | 0,02    | 2,16                        | 65          | 2                             | 3                     | Alb       |
| BID2482 | 0,04    | 1,46                        | 39          | 1                             | 1                     | Alb       |
| BID563  | 0,01    | 1,90                        | 107         | 2                             | 4                     | Aldh9a1   |
| BID451  | 0,00    | 1,67                        | 111         | 2                             | 3                     | Anxa11    |
| BID353  | 0,00    | 0,56                        | 104         | 2                             | 4                     | Arcn1     |
| BID991  | 0,02    | 0,58                        | 409         | 8                             | 25                    | Atp5c1    |
| SID1146 | 0,01    | 1,40                        | 126         | 3                             | 16                    | Capza1    |
| SID1444 | 0,03    | 1,67                        | 283         | 5                             | 29                    | Clic1     |
| SID1246 | 0,02    | 1,67                        | 157         | 4                             | 15                    | Clta      |
| BID1862 | 0,05    | 1,43                        | 68          | 2                             | 20                    | Cstb      |
| BID477  | 0,00    | 0,64                        | 37          | 1                             | 2                     | Cyp11a1   |
| BID526  | 0,00    | 0,57                        | 67          | 2                             | 6                     | Cyp11a1   |
| BID504  | 0,00    | 0,70                        | 165         | 2                             | 6                     | Cyp11b2   |
| BID436  | 0,03    | 1,44                        | 131         | 3                             | 10                    | D10Wsu52e |
| SID1240 | 0,05    | 1,48                        | 280         | 5                             | 20                    | Eef1d     |
| BID611  | 0,04    | 0,67                        | 144         | 3                             | 8                     | Eif4a3    |
| BID458  | 0,05    | 1,57                        | 190         | 4                             | 10                    | Fgb       |
| SID1428 | 0,05    | 0,63                        | 357         | 7                             | 29                    | Glod4     |
| SID1432 | 0,01    | 2,03                        | 347         | 7                             | 27                    | Glod4     |
| SID1202 | 0,03    | 1,92                        | 40          | 1                             | 2                     | Gnb4      |
| BID791  | 0,03    | 1,44                        | 410         | 7                             | 25                    | Hnrnpa3   |
| BID772  | 0,00    | 1,63                        | 102         | 2                             | 6                     | Hnrnpd    |
| SID661  | 0,00    | 0,66                        | 104         | 1                             | 4                     | Hspd1     |
| SID666  | 0,03    | 0,52                        | 55          | 1                             | 4                     | Hspd1     |
| SID952  | 0,03    | 2,74                        | 44          | 1                             | 1                     | Hspd1     |
| SID476  | 0,04    | 0,61                        | 77          | 2                             | 2                     | Immt      |
| SID1495 | 0,04    | 0,70                        | 97          | 2                             | 8                     | Impa1     |
| BID689  | 0,02    | 0,70                        | 264         | 6                             | 13                    | Ivd       |
| SID334  | 0,02    | 0,59                        | 775         | 14                            | 16                    | Lonp1     |
| SID343  | 0,00    | 0,63                        | 562         | 10                            | 13                    | Lonp1     |
| BID274  | 0,04    | 1,50                        | 202         | 4                             | 8                     | Mccc1     |
| SID1261 | 0,04    | 1,63                        | 42          | 1                             | 2                     | Mdh1      |
| BID372  | 0,02    | 0,58                        | 102         | 3                             | 6                     | Me1       |
| BID1266 | 0,00    | 1,69                        | 73          | 1                             | 5                     | Park7     |
| SID1435 | 0,05    | 0,61                        | 39          | 1                             | 3                     | Pnp       |
| SID1241 | 0,04    | 1,99                        | 106         | 2                             | 10                    | Rgn       |
| BID1272 | 0,04    | 2,37                        | 95          | 3                             | 11                    | Rpl9      |
| SID1047 | 0,02    | 0,66                        | 157         | 3                             | 10                    | Serpib6   |

|         |      |      |     |   |    |         |
|---------|------|------|-----|---|----|---------|
| BID566  | 0,01 | 1,43 | 73  | 1 | 3  | Sf3b4   |
| BID1063 | 0,01 | 0,65 | 40  | 1 | 3  | Slc25a5 |
| SID1574 | 0,04 | 1,43 | 41  | 1 | 3  | Star    |
| SID1586 | 0,00 | 1,44 | 120 | 3 | 12 | Star    |
| BID1176 | 0,04 | 1,29 | 36  | 1 | 4  | Star    |
| SID933  | 0,01 | 1,26 | 173 | 4 | 10 | Suclg2  |
| BID853  | 0,00 | 1,61 | 175 | 3 | 10 | Taldo1  |
| BID1296 | 0,03 | 1,98 | 132 | 2 | 12 | Tfam    |
| SID1219 | 0,04 | 1,76 | 160 | 3 | 22 | Txn1    |

| <b>Protein name</b>                                          |
|--------------------------------------------------------------|
| Short-chain specific acyl-CoA dehydrogenase, mitochondrial   |
| Acetyl-CoA acetyltransferase, cytosolic                      |
| Acyl-coenzyme A thioesterase 13                              |
| Actin, cytoplasmic 1                                         |
| Actin, cytoplasmic 1                                         |
| Adenosylhomocysteinase                                       |
| Adenosylhomocysteinase                                       |
| Serum albumin                                                |
| Serum albumin                                                |
| 4-trimethylaminobutyraldehyde dehydrogenase                  |
| Annexin A11                                                  |
| Coatomer subunit delta                                       |
| ATP synthase subunit gamma, mitochondrial                    |
| F-actin-capping protein subunit alpha-1                      |
| Chloride intracellular channel protein 1                     |
| Clathrin light chain A                                       |
| Cystatin-B                                                   |
| Cholesterol side-chain cleavage enzyme, mitochondrial        |
| Cholesterol side-chain cleavage enzyme, mitochondrial        |
| Cytochrome P450 11B2, mitochondrial                          |
| tRNA-splicing ligase RtcB homolog                            |
| Elongation factor 1-delta                                    |
| Eukaryotic initiation factor 4A-III                          |
| Fibrinogen beta chain                                        |
| Glyoxalase domain-containing protein 4                       |
| Glyoxalase domain-containing protein 4                       |
| Guanine nucleotide-binding protein subunit beta-4            |
| Heterogeneous nuclear ribonucleoprotein A3                   |
| Heterogeneous nuclear ribonucleoprotein D0                   |
| 60 kDa heat shock protein, mitochondrial                     |
| 60 kDa heat shock protein, mitochondrial                     |
| 60 kDa heat shock protein, mitochondrial                     |
| Mitochondrial inner membrane protein                         |
| Inositol monophosphatase 1                                   |
| Isovaleryl-CoA dehydrogenase, mitochondrial                  |
| Lon protease homolog, mitochondrial                          |
| Lon protease homolog, mitochondrial                          |
| Methylcrotonoyl-CoA carboxylase subunit alpha, mitochondrial |
| Malate dehydrogenase, cytoplasmic                            |
| NADP-dependent malic enzyme                                  |
| Protein DJ-1                                                 |
| Purine nucleoside phosphorylase                              |
| Regucalcin                                                   |
| 60S ribosomal protein L9                                     |
| Serpin B6                                                    |

|                                                               |
|---------------------------------------------------------------|
| Splicing factor 3B subunit 4                                  |
| ADP/ATP translocase 2                                         |
| Steroidogenic acute regulatory protein, mitochondrial         |
| Steroidogenic acute regulatory protein, mitochondrial         |
| Steroidogenic acute regulatory protein, mitochondrial         |
| Succinyl-CoA ligase [GDP-forming] subunit beta, mitochondrial |
| Transaldolase                                                 |
| Transcription factor A, mitochondrial                         |
| Thioredoxin-like protein 1                                    |
